# Supplementary material for: Chloroplast Ultrastructure and Photosynthetic Response of the Dinoflagellate Akashiwo sanguinea Throughout Infection by Amoebophrya sp.
Source: Frontiers journal article supplement (doi:10.3389/fmars.2021.742498), 2021-11-26
Supplement: Table_1.XLSX [file Table_1.XLSX]

## Sheet: Index
Table S1	Total Akshiwo sanguinea cell concentrations in control, filtrate-added and infected cultures (103 cells ml-1).
Table S2	The prevalence of infection in infected cultures (%).
Table S3	The infected and uninfected cell concentrations in infected cultures (103 cells ml-1).
Table S4	Total dinospores concentrations in infected cultures (105 cells ml-1).
Table S5	Variations in the photosynthetic efficiencies of Akshiwo sanguinea during the course of infection by Amoebophrya sp.
Table S6	Variations in the pigments of Akashiwo sanguinea during the course of infection by Amoebophrya sp. (pg cell-1).
Table S7	Relative mRNA expressions of photosynthesis gene in Akashiwo sanguinea during the course of infection by Amoebophrya sp.

## Sheet: Table S1
Sampling Time	Treatment
	Control cultures	Filtrate-added cultures	Infected cultures
0 h	3 ± 0.56	3 ± 0.56	3 ± 0.56
12 h	4.06333 ± 0.25146	3.925 ± 0.55861	3.7125 ± 0.17678
30 h	6.09667 ± 0.22502	5.655 ± 0.64347	4.555 ± 0.49689
54 h	7.96333 ± 0.40796	7.37 ± 0.56568	2.27667 ± 0.46715
70 h	10.35333 ± 0.17926	10.05 ± 0.72792	1.71 ± 0.73893

## Sheet: Table S2
Sampling Time	Infected cultures
0 h	0
12 h	31.25 ± 1.73
30 h	54.8 ± 2.84
54 h	85.83 ± 1.4
70 h	10.05 ± 0.73

## Sheet: Table S3
Sampling Time	Infected cells	Uninfected cells
0 h	0	3 ± 0.56
12 h	1.16016 ± 0.23503	2.55234 ± 0.18357
30 h	2.49614 ± 0.23905	2.05886 ± 0.21403
54 h	1.95407 ± 0.37115	0.3226 ± 0.16318
70 h	0.17186 ± 0.03086	1.53815 ± 0.28415

## Sheet: Table S4
Sampling Time	Infected cultures
0 h	0.03 ± 0.0002
12 h	0.01 ± 0.0008
30 h	0.01 ± 0.0004
54 h	0.17 ± 0.0009
70 h	2.34 ± 0.2147

## Sheet: Table S5
Sampling Time	Fv/Fm			φSPII
	Control cultures	Filtrate-added cultures	Infected cultures	Control cultures	Filtrate-added cultures	Infected cultures
0 h	0.58 ± 0.0224	0.58 ± 0.01809	0.58 ± 0.01809	0.47425 ± 0.00035	0.47425 ± 0.00035	0.47425 ± 0.00035
12 h	0.64 ± 0.02126	0.65 ± 0.02809	0.57733 ± 0.03099	0.5597 ± 0.00452	0.5675 ± 0.00212	0.54317 ± 0.00814
30 h	0.65 ± 0.02547	0.63 ± 0.01809	0.4475 ± 0.03323	0.572 ± 0.00965	0.568 ± 0.0099	0.52467 ± 0.00503
54 h	0.67 ± 0.02819	0.629 ± 0.01109	0.43567 ± 0.0365	0.5678 ± 0.00786	0.5525 ± 0.00071	0.51033 ± 0.009
70 h	0.64 ± 0.02549	0.65 ± 0.01809	0.511 ± 0.01556	0.568 ± 0.00921	0.571 ± 0.00849	0.516 ± 0.00778

## Sheet: Table S6
Sampling Time	chl a			Peridinin
	Control cultures	Filtrate-added cultures	Infected cultures	Control cultures	Filtrate-added cultures	Infected cultures
0 h	57.5709 ± 5.23304	57.5709 ± 5.23304	57.5709 ± 5.23304	47.09217 ± 2.95264	47.09217 ± 2.95264	47.09217 ± 2.95264
12 h	57.6521 ± 4.25762	56.66508 ± 6.05114	48.64623 ± 4.22938	47.54681 ± 2.47854	39.48325 ± 2.9149	47.01382 ± 1.92793
30 h	60.0015 ± 5.36758	59.40909 ± 5.9922	36.40805 ± 2.65974	48.1249 ± 2.48929	40.44665 ± 2.45213	44.12408 ± 0.13417
54 h	60.5389 ± 4.2576	60.45758 ± 6.4236	50.87694 ± 8.26156	46.8951 ± 2.78461	40.15858 ± 2.89275	48.22209 ± 2.3474
70 h	59.7851 ± 6.1249	56.53146 ± 7.26797	48.85672 ± 2.8344	46.6421 ± 3.01545	32.00619 ± 1.21028	40.00967 ± 0.03073
Sampling Time	Diatoxanthin			β-Carotene			Diadinoxanthin
	Control cultures	Filtrate-added cultures	Infected cultures	Control cultures	Filtrate-added cultures	Infected cultures	Control cultures	Filtrate-added cultures	Infected cultures
0 h	0.09376 ± 0.01834	0.09376 ± 0.01834	0.09376 ± 0.01834	0.60498 ± 0.04791	0.60498 ± 0.04791	0.60498 ± 0.04791	4.15774 ± 0.55275	4.15774 ± 0.55275	4.15774 ± 0.25275
12 h	0.10752 ± 0.02549	0.09788 ± 0.02222	0.12606 ± 0.01742	0.55128 ± 0.01582	0.58623 ± 0.03945	0.55355 ± 0.0431	4.01542 ± 0.45821	3.53026 ± 0.15517	4.54515 ± 0.36875
30 h	0.14515 ± 0.01458	0.13046 ± 0.01611	0.08811 ± 0.02629	0.59482 ± 0.02485	0.37266 ± 0.08302	0.30157 ± 0.03709	4.25841 ± 0.69845	3.2238 ± 0.45427	2.80657 ± 0.13025
54 h	0.19654 ± 0.02684	0.21034 ± 0.01596	0.1309 ± 0.01742	0.51278 ± 0.02784	0.32526 ± 0.02323	0.63654 ± 0.04955	3.94511 ± 0.48428	3.53678 ± 0.24344	4.19456 ± 0.20994
70 h	0.22458 ± 0.03845	0.19622 ± 0.01627	0.21218 ± 0.02826	0.54816 ± 0.04685	0.26721 ± 0.04191	0.62284 ± 0.05517	4.01945 ± 0.35185	1.72687 ± 0.5745	3.66086 ± 0.11499

## Sheet: Table S7
Sampling Time	psaA			psaB
	Control cultures	Filtrate-added cultures	Infected cultures	Control cultures	Filtrate-added cultures	Infected cultures
0 h	1.0024 ± 0.0981	1.0024 ± 0.0981	1.0024 ± 0.0981	1.0024 ± 0.0981	1.0024 ± 0.0981	1.0024 ± 0.0981
12 h	0.54863 ± 0.08367	0.35696 ± 0	0.22614 ± 0.07864	1.34895 ± 0.05896	0.42678 ± 0.10355	0.24561 ± 0.02584
30 h	0.86613 ± 0.0266	0.38715 ± 0.06054	0.06066 ± 0.00992	1.52043 ± 0.07625	0.67407 ± 0.19542	0.18134 ± 0.05426
54 h	0.85604 ± 0.17256	0.54104 ± 0.04507	0.53511 ± 0.13461	1.4512 ± 0.20886	0.90179 ± 0.04418	0.49824 ± 0.08511
70 h	0.54646 ± 0.20388	0.43632 ± 0.01992	0.08403 ± 0.06429	0.95262 ± 0.02625	0.75968 ± 0.07435	0.34632 ± 0.03244
Sampling Time	psbA			psbD
	Control cultures	Filtrate-added cultures	Infected cultures	Control cultures	Filtrate-added cultures	Infected cultures
0 h	1.00541 ± 0.1473	1.00541 ± 0.1473	1.00541 ± 0.1473	1 ± 0.01	1 ± 0.01	1 ± 0.01
12 h	1.04 ± 0.1	1.03775 ± 0.10156	0.63008 ± 0.09744	1.51825 ± 0.10061	0.48326 ± 0.02368	0.39833 ± 0.0353
30 h	0.94 ± 0.14	0.73909 ± 0.14398	0.27436 ± 0.07962	2.01548 ± 0.05178	0.63766 ± 0.03124	0.17384 ± 0.03462
54 h	1.46916 ± 0.21579	1.23188 ± 0.06035	0.43224 ± 0.16511	2.72326 ± 0.62839	0.78506 ± 0.03846	0.70568 ± 0.21095
70 h	1.54749 ± 0.32353	1.32665 ± 0.19437	0.12879 ± 0.06921	2.6706 ± 0.18499	0.26794 ± 0	0.5076 ± 0.02
Sampling Time	petA			petB
	Control cultures	Filtrate-added cultures	Infected cultures	Control cultures	Filtrate-added cultures	Infected cultures
0 h	1.0024 ± 0.0981	1.0024 ± 0.0981	1.0024 ± 0.0981	1.0006 ± 0.0981	1.0006 ± 0.0981	1.0006 ± 0.0981
12 h	0.96415 ± 0.01286	0.42678 ± 0.10355	0.24561 ± 0.02584	1.59612 ± 0.05622	0.48413 ± 0	0.32063 ± 0.01974
30 h	0.8647 ± 0.01861	0.67407 ± 0.09542	0.18134 ± 0.05426	1.83633 ± 0.03481	0.43763 ± 0.00472	0.13204 ± 0.06823
54 h	0.77203 ± 0.01253	0.90179 ± 0.04418	0.49824 ± 0.08511	1.9958 ± 0.04331	1.10957 ± 0.00837	0.31717 ± 0.09744
70 h	0.52043 ± 0.07625	0.75968 ± 0.07435	0.34632 ± 0.03244	1.7509 ± 0.02209	0.78647 ± 0.04122	0.25145 ± 0.026
